# Supplementary material
Source: publisher figshare collection journal article supplement (https://karger.figshare.com/ndownloader/files/27788580)

Supplementary Figure 2 a: Forest plot showing overall mortality in mixed, surgical and non-surgical patients


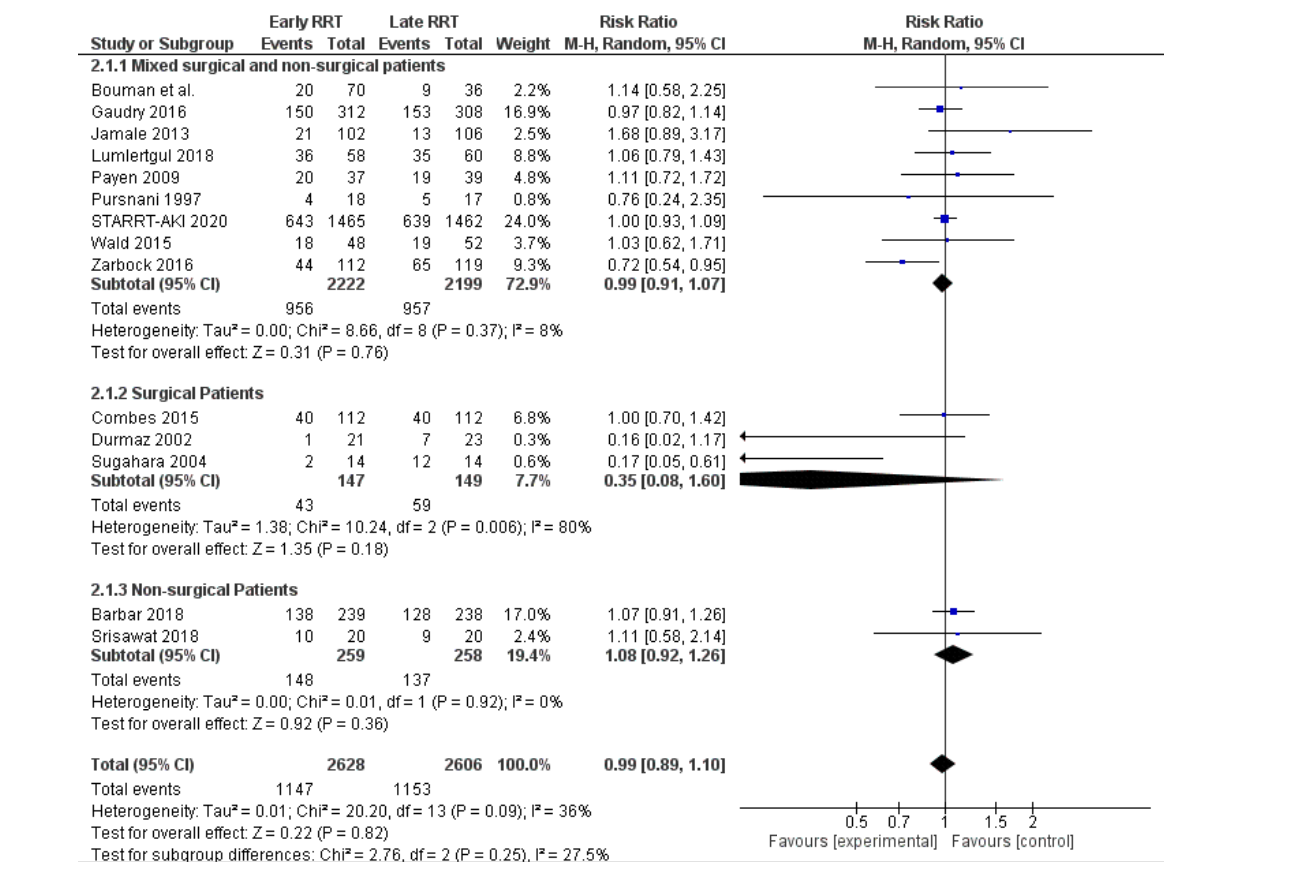


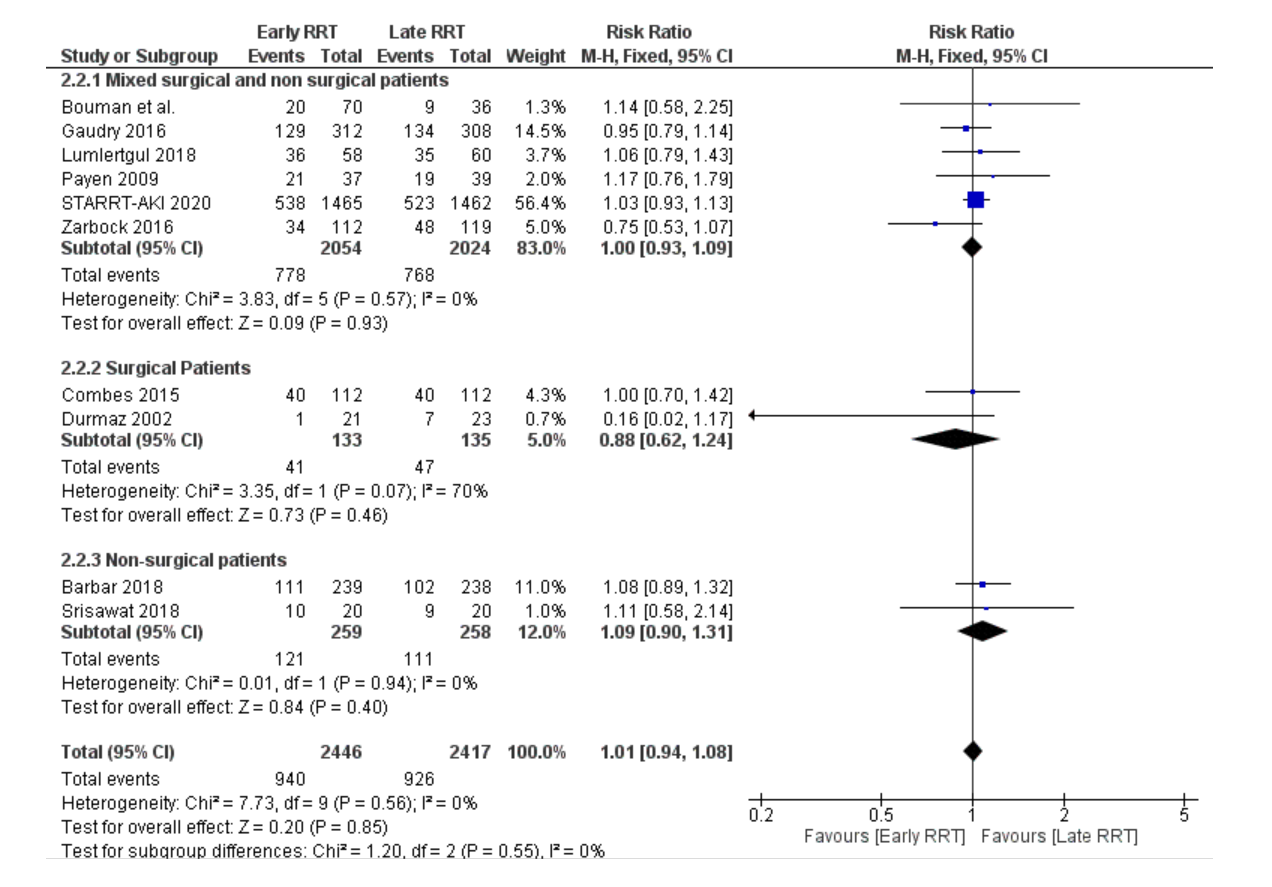


Supplementary Figure 2 b: Forest plot showing mortality on day 30 in mixed, surgical and non-surgical patients

Supplementary Figure 2 c: Forest plot showing mortality on day 90 in mixed, surgical and non-surgical patients


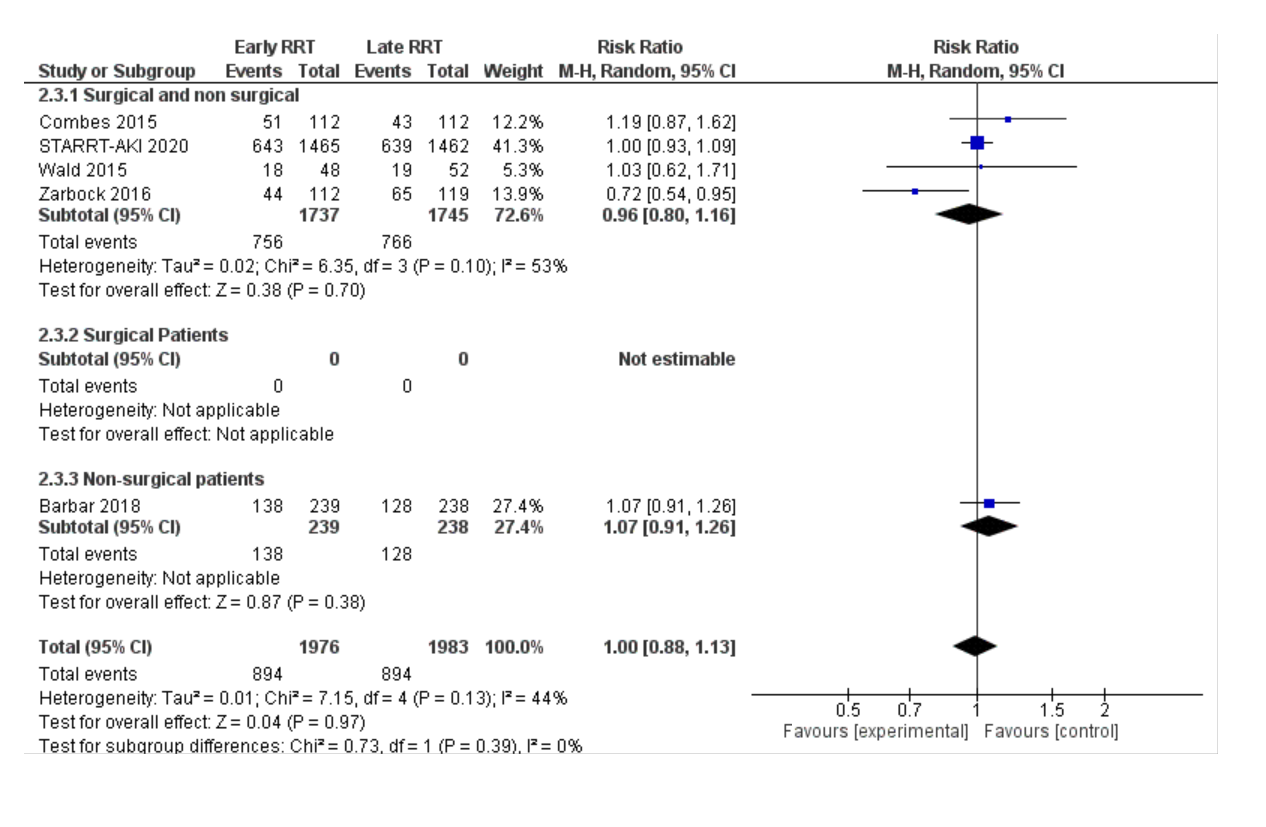


Supplementary Figure 2d: Forest plot showing overall ICU mortality in mixed, surgical and non-surgical patients


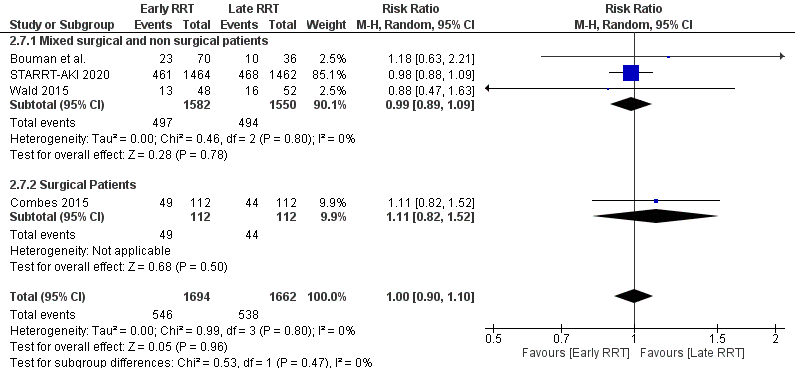

Supplement: Supplementary file 1 [file 27788580]
